# Supplementary material for: Ghrelin Alleviates Experimental Ulcerative Colitis in Old Mice and Modulates Colonocyte Metabolism via PPARγ Pathway
Source: MDPI journal article supplement (doi:10.3390/ijms24010565), 2022-12-29
Supplement: s1 [file s1]

## Supplement figure

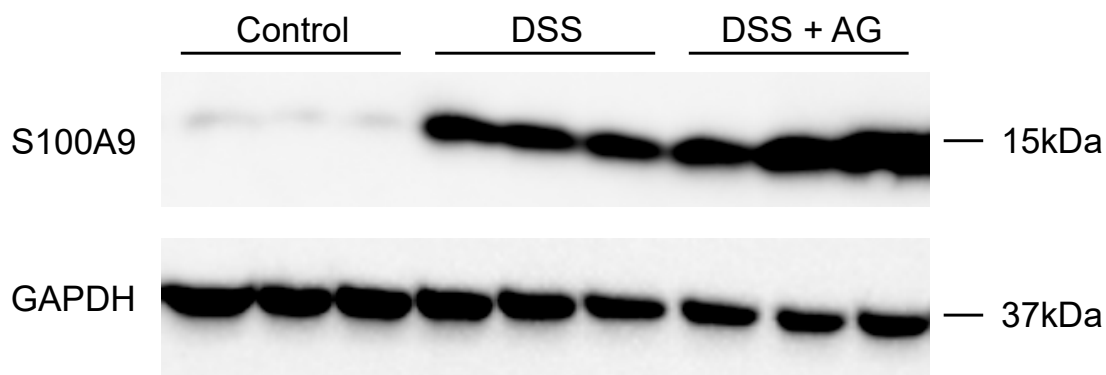

**Figure S1.** Ghrelin treatment did not affect colon inflammation as assessed by S100A9 expression in the early recovery phase. Colon homogenates from mice in DSS or DSS+AG groups collected on day 8 as well as control group were assayed using western blot analysis.
